# Supplementary material for: High-throughput and multi-dimensional omics approach uncovers a huaxian capsule to ameliorate the dysregulated expression profiling of severe sepsis rats
Source: Royal Society of Chemistry journal article supplement (doi:10.1039/c6ra28337c), 2017-01-01
Supplement: c6ra28337c1.pdf [file c6ra28337c1.pdf]

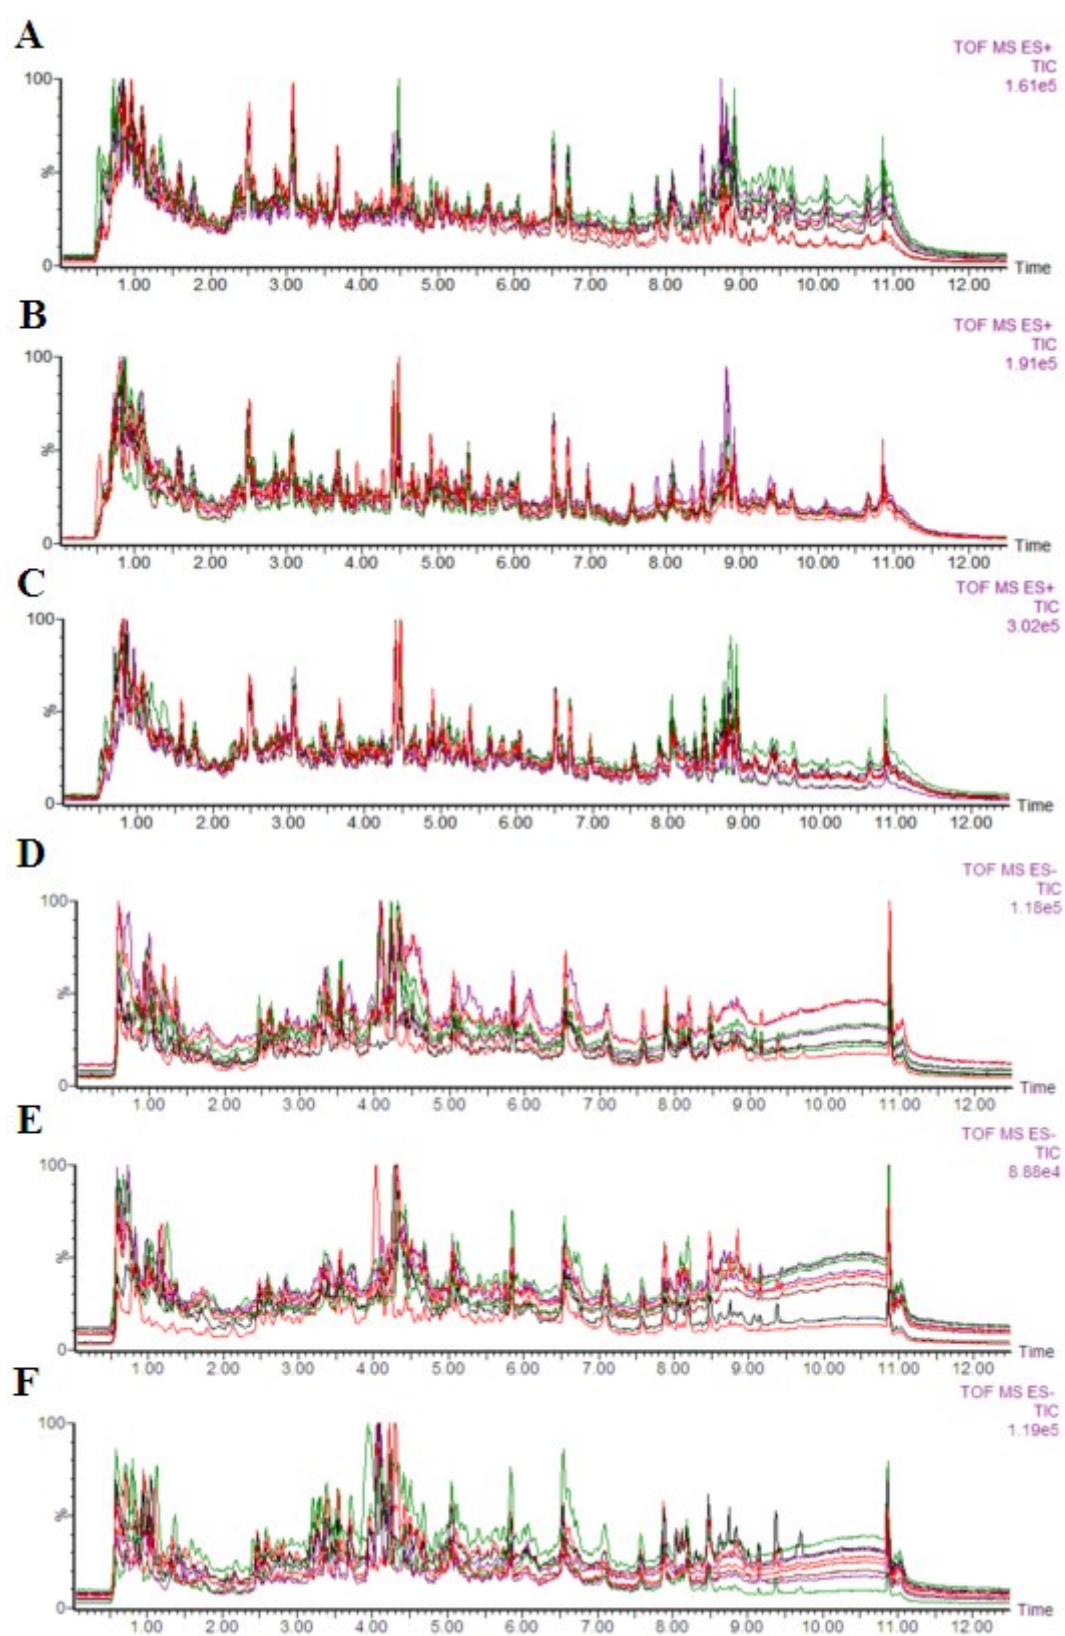

**Fig. S1.** Representative UPLC/MS spectra. Note: A, control group; B, model group; C, HXC group (ESI<sup>+</sup> mode). D, control group; E, model group; F, HXC group (ESI<sup>-</sup> mode).

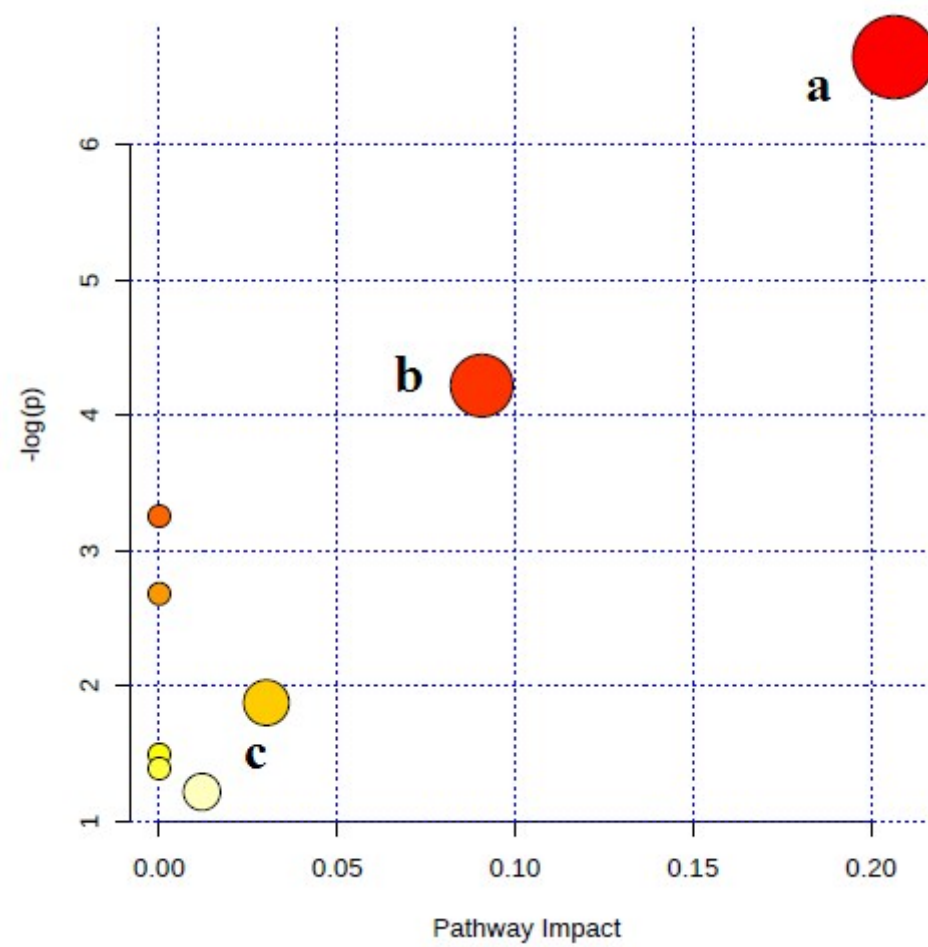

**Fig. S2** The altered metabolism pathways using MetPA analysis.

Note: a, glycerophospholipid metabolism; b, steroid hormone biosynthesis; c, sphingolipid metabolism.
